# Supplementary material for: Moderate N fertilizer reduction with straw return modulates cropland functions and microbial traits in a meadow soil
Source: Copernicus journal article supplement (doi:10.5194/soil-10-779-2024), 2024-11-05
Supplement: Supplementary file 1 [file soil-10-779-2024-supplement.pdf]

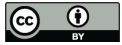

*Supplement of*

## **Moderate N fertilizer reduction with straw return modulates cropland functions and microbial traits in a meadow soil**

**Yan Duan et al.**

*Correspondence to:* Lifang Wu (lfwu@ipp.ac.cn)

The copyright of individual parts of the supplement might differ from the article licence.

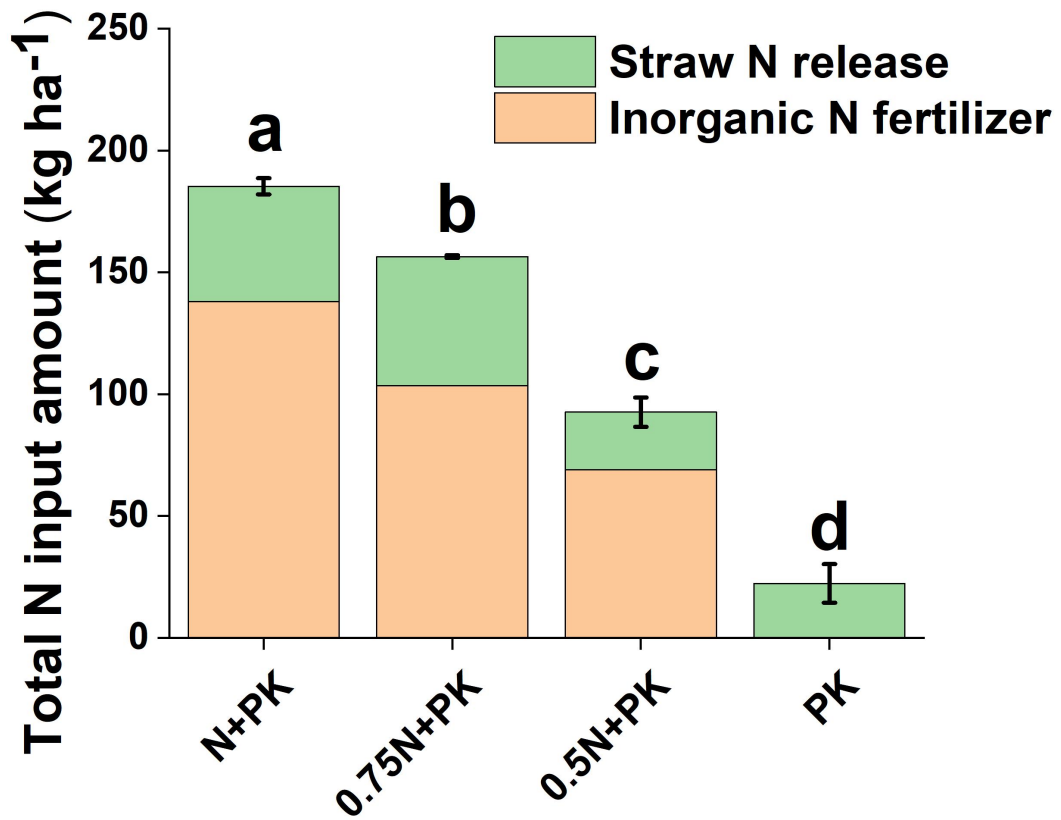

**Fig. S1** The total N fertilizer input amount under different treatments. Different letters indicate significant differences at the level of  $P < 0.05$ . N+PK, straw return plus regular inorganic N-P-K fertilizers; 0.75N+PK, straw return plus regular inorganic P-K with 25% N fertilizer reduction; 0.5N+PK, straw return plus regular inorganic P-K with 50% N fertilizer reduction; PK, straw return plus regular inorganic P-K without N fertilizer.

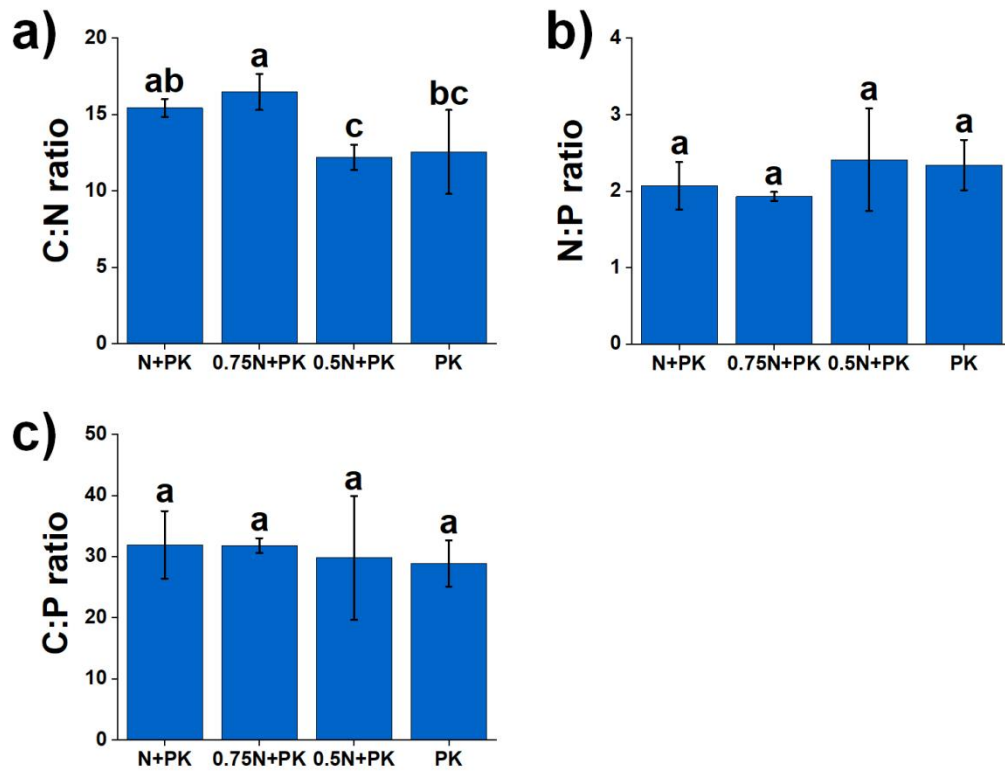

**Fig. S2** The soil C:N ratio (a), N:P ratio (b) and C:P ratio (c) under different treatments. Different letters indicate significant differences at the level of  $p < 0.05$ . N+PK, straw return plus regular inorganic N-P-K fertilizers; 0.75N+PK, straw return plus regular inorganic P-K with 25% N fertilizer reduction; 0.5N+PK, straw return plus regular inorganic P-K with 50% N fertilizer reduction; PK, straw return plus regular inorganic P-K without N fertilizer.

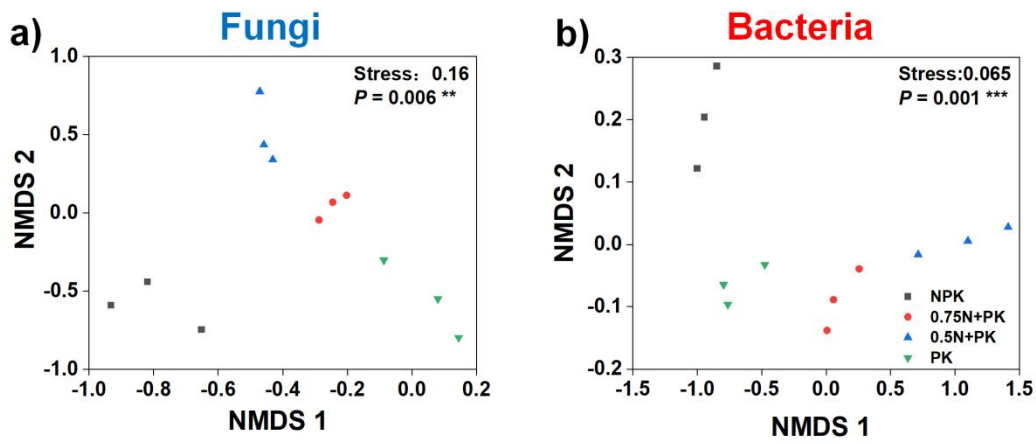

**Fig. S3** Non-metric multidimensional scaling ordination showing the fungi (a) and bacteria (b) under different N input levels; significant differences in sample clustering are measured by ANOSIM. N+PK, straw return plus regular inorganic N-P-K fertilizers; 0.75N+PK, straw return plus regular inorganic P-K with 25% N fertilizer reduction; 0.5N+PK, straw return plus regular inorganic P-K with 50% N fertilizer reduction; PK, straw return plus regular inorganic P-K without N fertilizer.

**Table S1** The yields and soil chemical properties under different treatments of bulk soil during the experimental process

| Year | Treatment | Yield (t ha <sup>-1</sup> ) | pH          | SOC (g kg <sup>-1</sup> ) | Total N (g kg <sup>-1</sup> ) | Total P (g kg <sup>-1</sup> ) |
|------|-----------|-----------------------------|-------------|---------------------------|-------------------------------|-------------------------------|
| 2019 | N+PK      | 11.17±0.73 a                | 7.29±0.14 a | 17.60±2.10 a              | 0.93±0.02 a                   | 0.65±0.08 a                   |
|      | 0.75N+PK  | 10.91±0.29 a                | 7.31±0.20 a | 15.87±3.12 ab             | 0.94±0.08 a                   | 0.61±0.12 a                   |
|      | 0.5N+PK   | 9.81±0.32 b                 | 7.39±0.18 a | 14.01±1.42 b              | 0.89±0.10 a                   | 0.64±0.03 a                   |
|      | PK        | 9.93±0.39 b                 | 7.51±0.20 a | 13.58±0.15 b              | 0.86±0.05 a                   | 0.55±0.27 a                   |
| 2020 | N+PK      | 11.39±0.33 a                | 7.27±0.10 a | 17.11±1.95 a              | 0.93±0.07 a                   | 0.69±0.07 a                   |
|      | 0.75N+PK  | 12.00±1.19 a                | 7.28±0.14 a | 17.01±1.77 a              | 0.88±0.21 a                   | 0.63±0.10 a                   |
|      | 0.5N+PK   | 9.88±0.84 b                 | 7.27±0.11 a | 12.45±0.16 b              | 0.86±0.01 ab                  | 0.67±0.07 a                   |
|      | PK        | 9.84±0.44 b                 | 7.48±0.16 a | 11.76±0.82 b              | 0.81±0.03 b                   | 0.59±0.05 a                   |
| 2021 | N+PK      | 11.41±0.05 ab               | 7.25±0.21 a | 21.08±1.82 a              | 1.37±0.11 a                   | 0.67±0.05 a                   |
|      | 0.75N+PK  | 11.65±0.06 a                | 7.28±0.14 a | 20.95±1.27 a              | 1.27±0.02 a                   | 0.66±0.19 a                   |
|      | 0.5N+PK   | 10.08±0.08 bc               | 7.25±0.02 a | 14.01±2.01 b              | 1.15±0.10 a                   | 0.49±0.10 b                   |
|      | PK        | 8.89±0.13 c                 | 7.39±0.10 a | 13.33±1.18 b              | 1.10±0.28 a                   | 0.47±0.08 b                   |

The results show means ± standard deviations (n = 3). Different lowercase letters after values indicate significant differences between each treatment in the same year, P < 0.05. SOC, soil organic carbon; N+PK, straw return plus regular inorganic N-P-K fertilizers; 0.75N+PK, straw return plus regular inorganic P-K with 25% N fertilizer reduction; 0.5N+PK, straw return plus regular inorganic P-K with 50% N fertilizer reduction; PK, straw return plus regular inorganic P-K without N fertilizer.

**Table S2** The basic chemical properties of initial and treated straw under different N input levels after straw return

| Treatment | Straw C (g kg <sup>-1</sup> ) | Total N (g kg <sup>-1</sup> ) | Total P (g kg <sup>-1</sup> ) | Total K (g kg <sup>-1</sup> ) |
|-----------|-------------------------------|-------------------------------|-------------------------------|-------------------------------|
| Initial   | 485.77±25.21 a                | 6.72±0.36 c                   | 2.01±0.12 a                   | 21.00±0.13 a                  |
| N+PK      | 428.86±17.82 b                | 17.20±0.51 ab                 | 1.36±0.11 b                   | 1.48±0.16 bc                  |
| 0.75N+PK  | 429.00±30.21 b                | 16.72±0.45 b                  | 1.45±0.10 b                   | 1.18±0.14 c                   |
| 0.5N+PK   | 427.72±29.96 b                | 18.15±1.03 a                  | 1.81±0.17 a                   | 1.86±0.10 b                   |
| PK        | 446.36±2.42 b                 | 18.33±0.53 a                  | 1.88±0.35 a                   | 1.77±0.46 b                   |

The results show means ± standard deviations (n = 3). Different lowercase letters after values indicate significant differences between each treatment,  $P < 0.05$ . SOC, soil organic carbon; N, nitrogen; P, phosphorus; K, potassium; N+PK, straw return plus regular inorganic N-P-K fertilizers; 0.75N+PK, straw return plus regular inorganic P-K with 25% N fertilizer reduction; 0.5N+PK, straw return plus regular inorganic P-K with 50% N fertilizer reduction; PK, straw return plus regular inorganic P-K without N fertilizer.

**Table S3** The abundances of fungal and bacterial abundances across different N fertilizer level treatments after straw return

| Treatment | Fungi abundance<br>( $\times 10^7$ copies $g^{-1}$ soil) | Bacteria abundance<br>( $\times 10^7$ copies $g^{-1}$ soil) | Fungi: Bacteria<br>ratio |
|-----------|----------------------------------------------------------|-------------------------------------------------------------|--------------------------|
| N+PK      | $0.63 \pm 0.16$ bc                                       | $3.15 \pm 0.30$ a                                           | $0.20 \pm 0.04$ b        |
| 0.75N+PK  | $0.85 \pm 0.09$ a                                        | $2.88 \pm 0.24$ ab                                          | $0.30 \pm 0.05$ a        |
| 0.5N+PK   | $0.57 \pm 0.04$ c                                        | $2.87 \pm 0.42$ ab                                          | $0.20 \pm 0.03$ b        |
| PK        | $0.39 \pm 0.05$ d                                        | $2.17 \pm 0.43$ b                                           | $0.18 \pm 0.02$ c        |

The results show means  $\pm$  standard deviations (n = 3). Different lowercase letters after values indicate significant differences between each treatment,  $P < 0.05$ . N+PK, straw return plus regular inorganic N-P-K fertilizers; 0.75N+PK, straw return plus regular inorganic P-K with 25% N fertilizer reduction; 0.5N+PK, straw return plus regular inorganic P-K with 50% N fertilizer reduction; PK, straw return plus regular inorganic P-K without N fertilizer.

**Table S4** The fungal and bacterial alpha diversity under different N input levels after straw return

|          | Treatment | Chao1            | Richness        |
|----------|-----------|------------------|-----------------|
| Fungi    | N+PK      | 1118.60±71.84 a  | 883.00±38.57 a  |
|          | 0.75N+PK  | 1117.82±67.17 a  | 796.33±28.45 ab |
|          | 0.5N+PK   | 1063.37±84.82 a  | 781.00±33.87 ab |
|          | PK        | 1054.50±22.29 a  | 772.33±27.54 b  |
| Bacteria | N+PK      | 5917.52±149.48 a | 4475.00±87.11 a |
|          | 0.75N+PK  | 5920.19±197.47 a | 4396.67±27.43 a |
|          | 0.5N+PK   | 5881.07±152.30 a | 4398.33±32.35 a |
|          | PK        | 5672.76±82.25 a  | 4241.00±64.55 b |

The results show means ± standard deviations (n = 3). Different lowercase letters after values indicate significant differences between each treatment,  $P < 0.05$ . N+PK, straw return plus regular inorganic N-P-K fertilizers; 0.75N+PK, straw return plus regular inorganic P-K with 25% N fertilizer reduction; 0.5N+PK, straw return plus regular inorganic P-K with 50% N fertilizer reduction; PK, straw return plus regular inorganic P-K without N fertilizer.



**Table S5** The relative abundances of keystone taxa across different N fertilizer level treatments after straw return

| Treatment | FOTU22<br>(Module 3) | BOTU21<br>(Module 1) | BOTU6346<br>(Module 3) | BOTU240<br>(Module 2) |
|-----------|----------------------|----------------------|------------------------|-----------------------|
| N+PK      | 388.33               | 453.67               | 63.67                  | 44.33                 |
| 0.75N+PK  | 536.67               | 638                  | 147                    | 79                    |
| 0.50N+PK  | 367                  | 303.33               | 150                    | 82.66                 |
| PK        | 109.33               | 421                  | 18.33                  | 63                    |

The results show means (n = 3). Different lowercase letters after values indicate significant differences between each treatment,  $P < 0.05$ . N+PK, straw return plus regular inorganic N-P-K fertilizers; 0.75N+PK, straw return plus regular inorganic P-K with 25% N fertilizer reduction; 0.5N+PK, straw return plus regular inorganic P-K with 50% N fertilizer reduction; PK, straw return plus regular inorganic P-K without N fertilizer. FOTU, the OTU in fungi; BOTU, the OTU in Bacteria.
